# Supplementary material
Source: PubMed Central journal article supplement (PMC3632482)
Supplement: 3c63e594257ac9f70526b4e8765384a3_genetics.113.150144-5.pdf [file 3c63e594257ac9f70526b4e8765384a3_genetics.113.150144-5.pdf]

**Table S2 Primers used in strain constructions and in the mapping of Ty elements**

| Primer name   | Sequence (5' to 3')                                                    |
|---------------|------------------------------------------------------------------------|
| GALCEN3/CAN F | ATGACAAATTCAAAAGAAGACGCCGACATAGAGGAGAAGCATATGTTCTCATGTTTGACAGCTTA      |
| GALCEN3/CAN R | CTATGCTACAACATTCCAAAATTTGTCCCAAAAAGTCTTTGGTTCTGATGTCGGCGATATAGGCG      |
| CAN1F         | AGGCGGCAGCAAAGCTAAC                                                    |
| CAN1R         | TACATGGAGACATCTACTGG                                                   |
| pBR322FTest   | TCGCTACTTGGAGCCACTATC                                                  |
| URA3R         | AGCAACAGGACTAGGATGAG                                                   |
| CANupF        | AATCTGTCGTCGAATCGAAAG                                                  |
| CANdnR        | TTATACATTAGTATTAGCGTG                                                  |
| GALCEN3/80k F | TCATCCCACTCACCACCGTCATCGTTGGTATTATTATTATCATTCCGCTTTTCTCATGTTTGACAGCTTA |
| GALCEN3/80k R | TTCTCGAGCTTCACAACACGATATATATATATGTTGTGTGCCTTTGTCTTTGATGTCGGCGATATAGGCG |
| 80kupF        | TGGTATACGAGCTAGCAGGAC                                                  |
| 80kdnR        | AGAGAACTATTCTGATCTAATC                                                 |
| KCC4 F2 82211 | ACGCTGACCAAGCTTGCTACAG                                                 |
| Ty2R 85162    | AACCGAAGCATAGGCGCTACC                                                  |
| Ty2R 85553    | AGCTTGAGGTACTTCAGAGTG                                                  |
| RKCC4-1       | CGTTATCTTTCTTGTGATTATCTTCCTTC                                          |
| KCC4-1        | GCGAAGATCCCAGAAATAGCCGAGAGTATC                                         |
| Ty1F          | TGCAGACGTAATGACCAAACCTC                                                |
| Ty1R          | TGTGGACTTCCTTAGAAGTAACC                                                |
