# Supplementary material
Source: PubMed Central journal article supplement (PMC3632482)
Supplement: 41ab5e4f288de1385e3f1e4ff1b203a3_genetics.113.150144-2.pdf [file 41ab5e4f288de1385e3f1e4ff1b203a3_genetics.113.150144-2.pdf]

**Table S1 Strain genotypes**

---

|                   |                                                                                                                                                                                                                     |
|-------------------|---------------------------------------------------------------------------------------------------------------------------------------------------------------------------------------------------------------------|
| <b>J178-#7-20</b> | <i>MATa ade1 met14 ura3-52 leu2-3,112 his3 his4::GAL-CEN3/URA3 rad52</i>                                                                                                                                            |
| <b>PSL5</b>       | <i>MATα ade2-1 ura3 can1Δ::SUP4-o gal2 ho::hisG</i><br><i>MATa/MATα ade1/ADE1 ADE2/ade2-1 met14/MET14 ura3-52/ura3 leu2-3,112/LEU2 his3/HIS3 his4::GAL-CEN3/URA3/HIS4 rad52/RAD52 CAN1/can1Δ::SUP4-o</i>            |
| <b>WS49</b>       | <i>GAL2/gal2</i>                                                                                                                                                                                                    |
| <b>J178-1d</b>    | <i>MATa ade1 met14 ura3-52 leu2-3,112 his3</i>                                                                                                                                                                      |
| <b>MG42</b>       | <i>MATa ade1 met14 ura3-52 leu2-3,112 his3 can1Δ::GAL-CEN3/URA3</i>                                                                                                                                                 |
| <b>WS83</b>       | <i>MATa/MATα ade1/ADE1 ADE2/ade2-1 met14/MET14 ura3-52/ura3 leu2-3,112/LEU2, his3/HIS3, can1Δ::GAL-CEN3/URA3/can1Δ::SUP4-o GAL2/gal2</i>                                                                            |
| <b>MG48</b>       | <i>MATa ade1 met14 ura3-52 leu2-3,112 his3 V80412-80162Δ::GAL-CEN3/URA3</i><br><i>MATa/MATα ade1/ADE1 ADE2/ade2-1 met14/MET14 ura3-52/ura3 leu2-3,112/LEU2 his3/HIS3, V80412-80162Δ::GAL-CEN3/URA3/V80412-80162</i> |
| <b>WS92</b>       | <i>CAN1/can1Δ::SUP4-o GAL2/gal2</i>                                                                                                                                                                                 |

---
