# Supplementary material
Source: PubMed Central journal article supplement (PMC3632482)
Supplement: e4c38a3c46693b42b60f6f323eef861b_genetics.113.150144-3.pdf [file e4c38a3c46693b42b60f6f323eef861b_genetics.113.150144-3.pdf]

**Table S3 Primers used in PCR-based analysis of polymorphic markers on left arm of chromosome III**

| SGD coordinates<br>for polymorphic<br>site (marker<br>name) | F primer sequence (5' to<br>3')          | R primer sequence (5' to 3') | S288c SGD<br>coordinates of<br>amplification (5' of F<br>primer) | S288c SGD<br>coordinates of<br>amplification (5'<br>end of R primer) | Diagnostic<br>restriction<br>enzyme | Strain with<br>restriction enzyme<br>site |
|-------------------------------------------------------------|------------------------------------------|------------------------------|------------------------------------------------------------------|----------------------------------------------------------------------|-------------------------------------|-------------------------------------------|
| 33032 (33)                                                  | GGTATTGAAGCCGCAAGTT<br>TGG               | TCTCCTTCGACACCTTCATCG        | 32634                                                            | 33031                                                                | <i>BbvI</i>                         | PSL5                                      |
| 57640 (58)                                                  | TTGCAAGTGTGAGAGGCC                       | AGGATGGTTTTGCTCCATTG         | 57355                                                            | 57814                                                                | <i>HpyCH4IV</i>                     | J178-#7-20                                |
| 68096 (68)                                                  | TCTGTACGTACTTCACC                        | TGGTTTTGCCGATT CTAC          | 67897                                                            | 68331                                                                | <i>NheI</i>                         | J178-#7-20                                |
| 70426 (70)                                                  | ATCGCAGGATACGTCATGG                      | AGAGCTTGCCATAGAAGCC          | 70294                                                            | 70788                                                                | <i>Hpy166II</i>                     | PSL5                                      |
| 74203 (74)                                                  | AAGCGTAAATAGTACGAC<br>G                  | TCGCGTTACAAACAAGATG          | 73929                                                            | 74425                                                                | <i>BstBI</i>                        | PSL5                                      |
| 77646 (78)                                                  | ACCCATAATAGCGTAACC<br>ACGGTCAAGCAAAGATTA | TCGCACAATGTCGTCGTC           | 77434                                                            | 77926                                                                | <i>BanII</i>                        | J178-#7-20                                |
| 80845 (81)                                                  | T C                                      | AGGCCTAGTATATGACGAAAG        | 80589                                                            | 81025                                                                | <i>HhaI</i>                         | PSL5                                      |
| 91332 (91)                                                  | GCTATCGCACAGAATCA<br>AGATAATAAACCGCCTACT | AGTGAACACCTGTAGC             | 91011                                                            | 91496                                                                | <i>HaeIII</i>                       | PSL5                                      |
| 96056 (96)                                                  | AC                                       | ATCATCAAACAATGAATGACC        | 95913                                                            | 96412                                                                | <i>BsrBI</i>                        | PSL5                                      |
| 97697 (98)                                                  | TGCAGCATTACTATTCCTTA<br>TTTC             | TGTTTGATCCATCTGAAGGTAG       | 97313                                                            | 97859                                                                | <i>BtgI</i>                         | PSL5                                      |

|              |                      |                           |        |        |                |            |
|--------------|----------------------|---------------------------|--------|--------|----------------|------------|
| 102361 (102) | TGTGGTTTCAATTCCGCG   | TAGAATTGGATTCAACGG        | 102211 | 102610 | <i>HpyCH4V</i> | J178-#7-20 |
| 103500 (103) | TTGATCTACTCCTATCATT  |                           |        |        |                |            |
|              | CC                   | TGAAG TACTC AAAGT CGTAG C | 103313 | 103910 | <i>Hpy99I</i>  | J178-#7-20 |
| 105855 (106) |                      |                           |        |        |                |            |
|              | ATGGCACTTCGGCGATGC   | ATACAGAGAGGATGTGGAC       | 105665 | 106149 | <i>BstNI</i>   | J178-#7-20 |
| 106777 (107) | AGCAGTGGAGTATGGGCA   |                           |        |        |                |            |
|              | GC                   | ATTCGTTGGACCTTTGTTTC      | 106454 | 107004 | <i>Hpy99I</i>  | J178-#7-20 |
| 111457 (111) | TGGAAGTAATGGAAATGC   |                           |        |        |                |            |
|              | CC                   | TTGTTCTGCAGGGCTTGGC       | 111229 | 111664 | <i>RsaI</i>    | J178-#7-20 |
| 112761 (113) |                      |                           |        |        |                |            |
|              | ATTCAACGAACACATTCG   | TGAAGTCTATTGTGCCAC        | 112504 | 112993 | <i>BstBI</i>   | J178-#7-20 |
| 116012 (116) | TCCCAACTCCTTCGGCTAAT |                           |        |        |                |            |
|              | ATG                  | ATGCGCAGGTGAGCTGATTG      | 115864 | 116365 | <i>BslI</i>    | J178-#7-20 |

---
